# Supplementary material
Source: ML conference proceedings conference paper supplement (https://aclanthology.org/2021.semspace-1.6)
Supplement: Attachment [file 2021.semspace-1.6.Attachment.zip]

## A Proofs

### A.1 Support inverse reverses $k$ -hyponymy

**Theorem 1.** For two density matrices  $A$  and  $B$ ,  $k$ -hyponymy is reversed by support inverse when  $\text{rank}(A) = \text{rank}(B)$ :

$$A \sqsubseteq_k B \iff \neg_{\text{supp}} B \sqsubseteq_k \neg_{\text{supp}} A \quad (21)$$

*Proof.* From (Baksalary et al., 1989),  $\neg_{\text{supp}}$  reverses Löwner order when  $\text{rank}(A) = \text{rank}(B)$ :

$$A \sqsubseteq B \iff \neg_{\text{supp}} B \sqsubseteq \neg_{\text{supp}} A \quad (22)$$

Thus, letting “ $\geq 0$ ” denote the operator is positive:

$$A \sqsubseteq_k B \iff B - kA \geq 0 \quad (23)$$

$$\iff (kA)^{-1} - B^{-1} \geq 0 \quad (24)$$

$$\iff \frac{1}{k}A^{-1} - B^{-1} \geq 0 \quad (25)$$

$$\iff A^{-1} - kB^{-1} \geq 0 \quad (26)$$

$$\iff B^{-1} \sqsubseteq_k A^{-1} \quad (27)$$

using Equations 5 and 22 from Equation 23 to 24.  $\square$

**Corollary 1.** For two invertible density matrices  $A$  and  $B$ ,  $k$ -hyponymy is reversed by matrix inverse:

$$A \sqsubseteq_k B \iff B^{-1} \sqsubseteq_k A^{-1} \quad (28)$$

### A.2 Matrix inverse reverses $k_{BA}$ in same basis case

**Theorem 2.** For two density matrices  $A$  and  $B$  with the same eigenbasis,  $k_{BA}$  is reversed by matrix inverse:

$$k_{BA}(B^{-1}, A^{-1}) = k_{BA}(A, B) \quad (29)$$

*Proof.*

$$k_{BA}(B^{-1}, A^{-1}) = \frac{\sum_i \lambda_{A^{-1}}^i - \lambda_{B^{-1}}^i}{\sum_i |\lambda_{A^{-1}}^i - \lambda_{B^{-1}}^i|} \quad (30)$$

$$= \frac{\sum_i \frac{1}{\lambda_A^i} - \frac{1}{\lambda_B^i}}{\sum_i \left| \frac{1}{\lambda_A^i} - \frac{1}{\lambda_B^i} \right|} \quad (31)$$

$$= \frac{\sum_i \lambda_B^i - \lambda_A^i}{\sum_i |\lambda_B^i - \lambda_A^i|} \quad (32)$$

$$= k_{BA}(A, B) \quad (33)$$

using Equation 13 from Equation 30 to 31.  $\square$

### A.3 Composing with $\neg_{\text{sub}}$ or $\neg_{\text{inv}}$ gives maximally mixed support

**Theorem 3.** When composing a density matrix  $X$  with  $\neg_{\text{supp}} X$  via spider, fuzz, or phaser, the resulting density matrix has the desired property of being a maximally mixed state on the support with zeroes on the kernel.

*Proof.*  $\neg_{\text{supp}} X$  and  $X$  have the same eigenbasis. From Equation 13, all nonzero eigenvalues of  $\neg_{\text{supp}} X$  are multiplicative inverses of the corresponding eigenvalue of  $X$ .

We use definitions of *spider*, *fuzz*, and *phaser* from Equations 1, 2, and 3. The summation indices are over eigenvectors with nonzero eigenvalue.

$$\text{spider}(X, \neg_{\text{supp}} X) \quad (34)$$

$$= U_s(X \otimes \neg_{\text{supp}} X) U_s^\dagger \quad (35)$$

$$= \left( \sum_i |i\rangle \langle ii| \right) (X \otimes \neg_{\text{supp}} X) \left( \sum_j |jj\rangle \langle j| \right) \quad (36)$$

$$= \sum_i |i\rangle \langle ii| \left( (\lambda |i\rangle \langle i|) \otimes \left( \frac{1}{\lambda_i} |i\rangle \langle i| \right) \right) |ii\rangle \langle i| \quad (37)$$

$$= \sum_i |i\rangle \langle i| \quad (38)$$

$$= \mathbb{I}_{\text{supp}} \quad (39)$$

$$\text{fuzz}(X, \neg_{\text{supp}} X) = \sum_i x_i P_i \circ X \circ P_i \quad (40)$$

$$= \sum_i \frac{1}{\lambda_i} P_i \left( \sum_j \lambda_j P_j \right) P_i \quad (41)$$

$$= \sum_i P_i \quad (42)$$

$$= \mathbb{I}_{\text{supp}} \quad (43)$$

$$\text{phaser}(X, \neg_{\text{supp}} X) \quad (44)$$

$$= \left( \sum_i x_i P_i \right) \circ X \circ \left( \sum_i x_i P_i \right) \quad (45)$$

$$= \left( \sum_i \lambda_i^{-\frac{1}{2}} P_i \right) \left( \sum_j \lambda_j P_j \right) \left( \sum_k \lambda_k^{-\frac{1}{2}} P_k \right) \quad (46)$$

$$= \sum_i P_i \quad (47)$$

$$= \mathbb{I}_{\text{supp}} \quad (48)$$

$\square$

**Corollary 2.** *When composing a density matrix  $X$  with  $\neg_{inv} X$  via spider, fuzz, or phaser, the resulting density matrix has the desired property of being a maximally mixed state on the support with zeroes on the kernel.*
